# Supplementary material for: MST3 promotes proliferation and tumorigenicity through the VAV2/Rac1 signal axis in breast cancer
Source: PubMed Central journal article supplement (PMC4924737; doi:10.18632/oncotarget.7542), 2016-02-20
Supplement: oncotarget-07-14586-s001.pdf [file oncotarget-07-14586-s001.pdf]

## MST3 promotes proliferation and tumorigenicity through the VAV2/Rac1 signal axis in breast cancer

### Supplementary Material

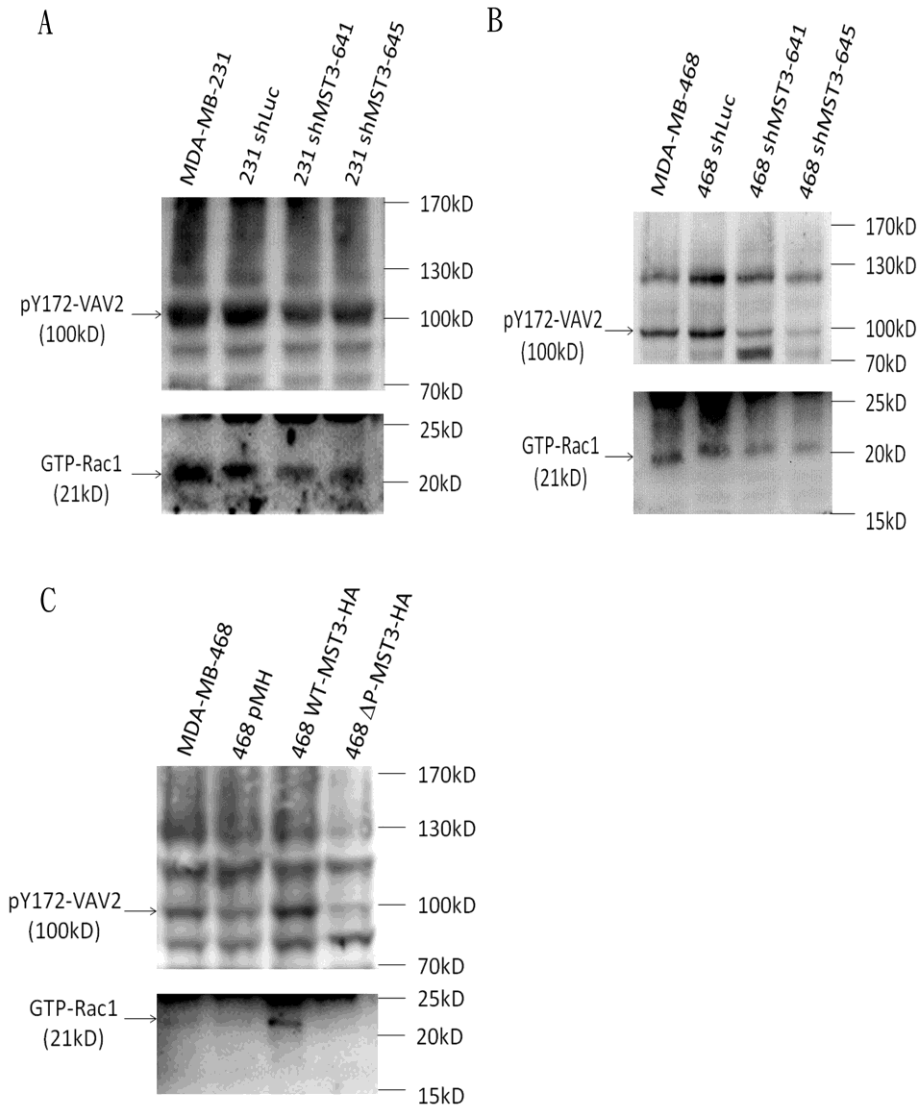

**Supplementary Figure 1.** The expression of phosphorylated VAV2 and GTP Rac1 in MDA-MB-231 and MDA-MB-468 stable transfectant cells by Western blotting. (A) Original images of pY172-VAV2 and GTP-Rac1 in figure 6A were shown. (B) Original images of pY172-VAV2 and GTP-Rac1 in figure 6C were shown. (C) Original images of pY172-VAV2 and GTP-Rac1 in figure 6E were shown.
